# Supplementary material for: Validation of AAC-11-Derived Peptide Anti-Tumor Activity in a Single Graft Sézary Patient-Derived Xenograft Mouse Model
Source: MDPI journal article supplement (doi:10.3390/cells11192933), 2022-09-20
Supplement: s1 [file s1]

**Table S1: Main cutaneous and blood features of the engrafted mice**

| Experiment<br>n° | n  | End Point<br>(Day post-<br>engraftment) | Adverse effects<br>leading to<br>sacrifice      | Cutaneous manifestations |                                          |                                                      | Blood involvement at end point*                                               |                                        |                                                                      |
|------------------|----|-----------------------------------------|-------------------------------------------------|--------------------------|------------------------------------------|------------------------------------------------------|-------------------------------------------------------------------------------|----------------------------------------|----------------------------------------------------------------------|
|                  |    |                                         | n (Cause; Day<br>post-engraftment)              | n                        | Appearance<br>(Day post-<br>engraftment) | Type                                                 | n                                                                             | % CD4 <sup>+</sup> /<br>T cells        | % Vβ <sup>+</sup> KIR3DL2 <sup>+</sup> /<br>CD4 <sup>+</sup> T cells |
| 1                | 3  | 63                                      | 1/3 (GVHD; Day<br>38)                           | 2/3                      | Range: 45-50                             | Erythrodermia                                        | 1/2                                                                           | 98.3                                   | 25.1                                                                 |
| 2                | 3  | 60                                      | none                                            | 3/3                      | Range: 34-49                             | Patch/Plaque<br>evolving towards<br>transformed-like | 3/3                                                                           | Mean±SD: 91.7±6.8<br>Range: 84.0-96.6  | Mean±SD:<br>11.9±14.5<br>Range: 3.1-28.7                             |
| 3                | 3  | 70                                      | 1/3 (infection due<br>to scratching; Day<br>53) | 2/3                      | Range: 35-40                             | Patch/Plaque<br>evolving towards<br>transformed-like | 3/3                                                                           | Mean±SD: 67.1±30.4<br>Range: 34.6-94.7 | Mean±SD:<br>36.8±53.1<br>Range: 3.2-98.8                             |
| 4                | 15 | NT/RT39M: 84<br>RT39:120                | none                                            | 15/15                    | Range: 32-38                             | Transformed-like                                     | less than 2% of circulating T cells at experiment end<br>point for all groups |                                        |                                                                      |

\* the % of CD4<sup>+</sup> T cells among circulating T cells (identified as CD45<sup>+</sup> CD3<sup>+</sup> cells), and of malignant TCR-Vβ<sup>+</sup> KIR3DL2<sup>+</sup> cells within CD4<sup>+</sup> T cells, were determined by flow cytometry on mice blood using anti-human-CD45, -CD3, -CD4, -KIR3DL2 and -TCR-Vβ mAbs.
