# Supplementary material for: Validation of AAC-11-Derived Peptide Anti-Tumor Activity in a Single Graft Sézary Patient-Derived Xenograft Mouse Model
Source: MDPI journal article supplement (doi:10.3390/cells11192933), 2022-09-20
Supplement: s1 [file s1]

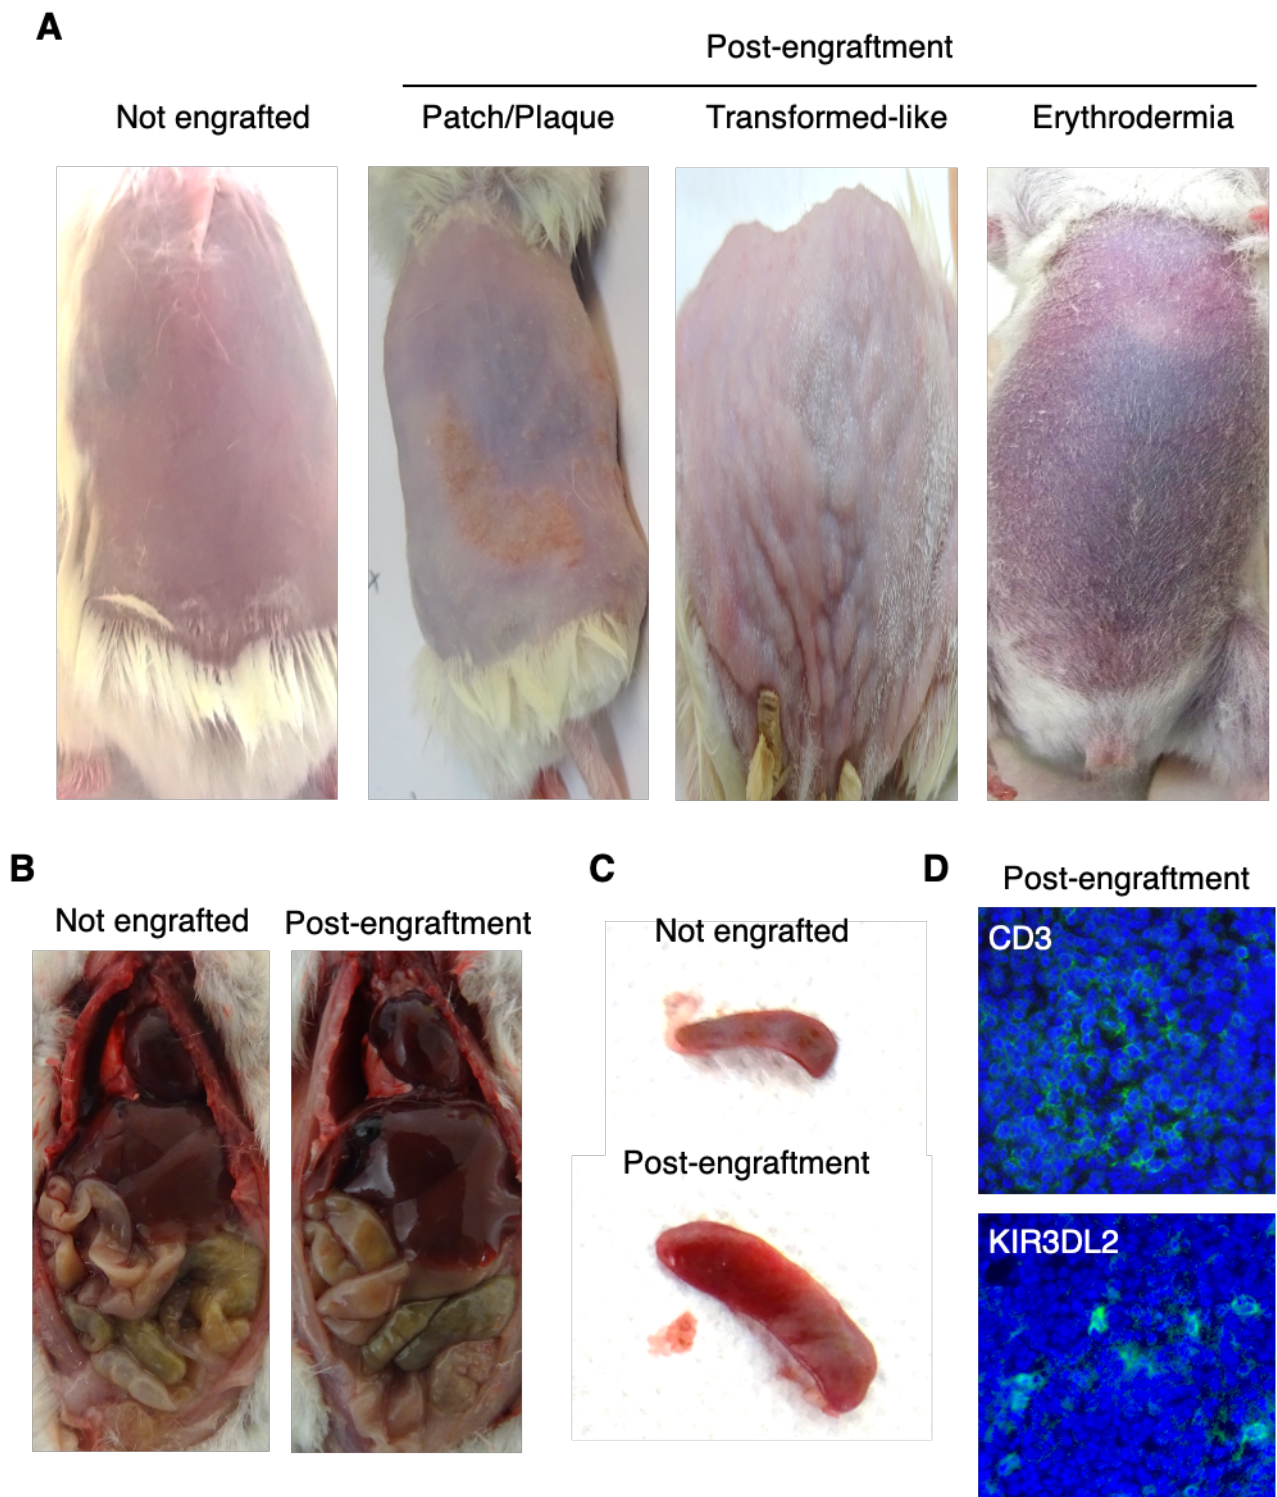

**Figure S1: Main organs characteristics encountered in Sézary PDX mice.** (A) Visual evaluation of the different types of cutaneous disorders observed post-engraftment. (B) Absence of noticeable tumor development in visceral organs (C) Spleen enlargement (n=7/8). (D) Immunofluorescence analysis of a representative enlarged spleen showing the presence of numerous CD3<sup>+</sup> T cells but only few malignant KIR3DL2<sup>+</sup> cells.
